# Supplementary material for: Green Synthesis of FexOy Nanoparticles with Potential Antioxidant Properties
Source: MDPI journal article supplement (doi:10.3390/nano12142449), 2022-07-17
Supplement: s1 [file s1]

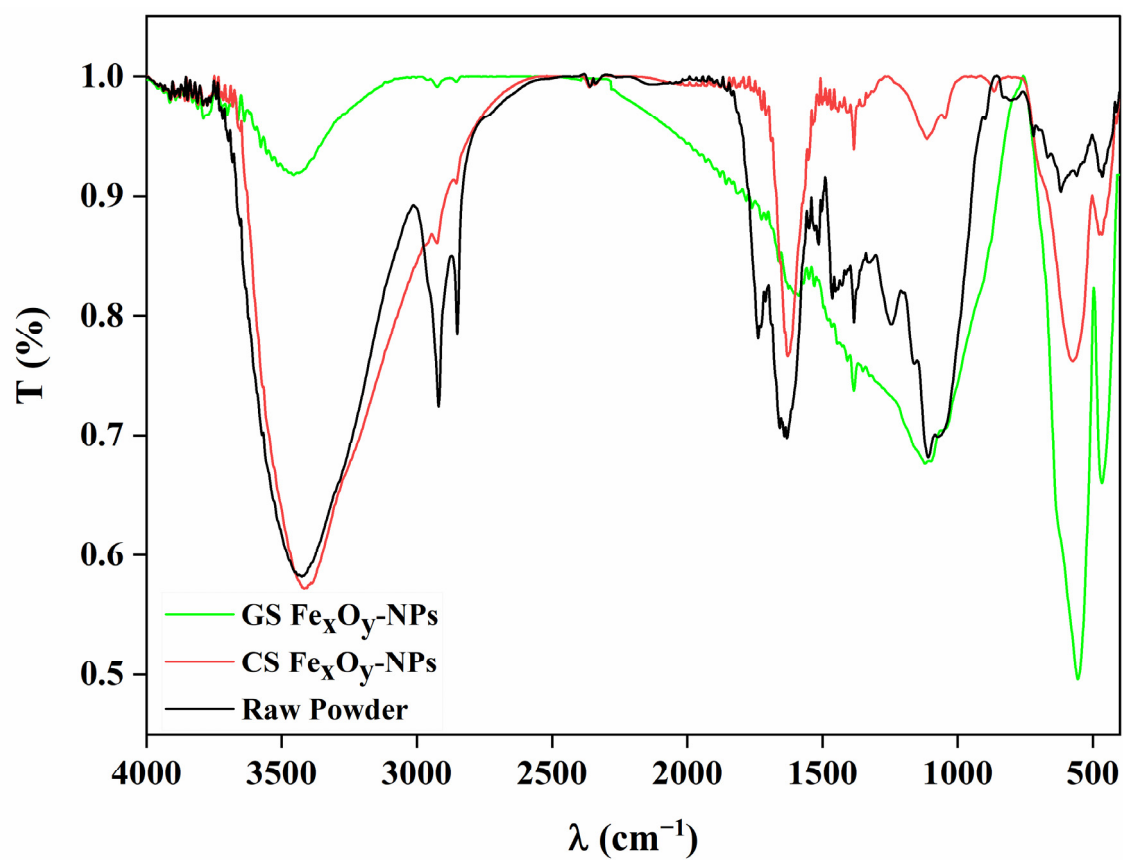

**Figure S1:** FTIR of the GS  $\text{Fe}_x\text{O}_y$ -NPs compared with its raw material powder and CS- $\text{Fe}_x\text{O}_y$ -NPs.
